# Supplementary material
Source: bioRxiv or medRxiv preprint supplement (https://www.biorxiv.org/highwire/filestream/108602/field_highwire_adjunct_files/35/178806-7.pdf)
Supplement: Supplementary file [file 178806-7.pdf]

# IDP GWAS Manhattan Plots

## List of Figures

|    |                                                |    |
|----|------------------------------------------------|----|
| 1  | T1 FAST ROIs R intracalc cortex                | 1  |
| 2  | T1 FAST ROIs R hippocampus                     | 2  |
| 3  | T1 FAST ROIs R ventral striatum                | 3  |
| 4  | T1 FAST ROIs L cerebellum crus I               | 4  |
| 5  | T1 FAST ROIs V cerebellum VIIIa                | 5  |
| 6  | T1 FAST ROIs L cerebellum IX                   | 6  |
| 7  | T2 FLAIR BIANCA WMH volume                     | 7  |
| 8  | dMRI TBSS MO Pontine crossing tract            | 8  |
| 9  | dMRI TBSS ICVF Genu of corpus callosum         | 9  |
| 10 | dMRI TBSS ICVF Splenium of corpus callosum     | 10 |
| 11 | dMRI TBSS ICVF Superior cerebellar peduncle L  | 11 |
| 12 | dMRI TBSS OD Genu of corpus callosum           | 12 |
| 13 | dMRI ProbtrackX ICVF ilf r                     | 13 |
| 14 | dMRI ProbtrackX ISOVF unc r                    | 14 |
| 15 | NETMAT amplitudes (25) 05                      | 15 |
| 16 | NETMAT amplitudes (25) 12                      | 16 |
| 17 | NETMAT amplitudes (25) 13                      | 17 |
| 18 | T1 FIRST left plus right pallidum volume       | 18 |
| 19 | SWI T2star left plus right caudate             | 19 |
| 20 | SWI T2star left plus right putamen             | 20 |
| 21 | SWI T2star left plus right pallidum            | 21 |
| 22 | FreeSurfer volume Left-Cerebellum-White-Matter | 22 |
| 23 | FreeSurfer volume 4th-Ventricle                | 23 |
| 24 | FreeSurfer volume Right-Putamen                | 24 |
| 25 | FreeSurfer volume MaskVol                      | 25 |
| 26 | FreeSurfer a2009s rh S central area            | 26 |
| 27 | NETMAT edge ICA 2                              | 27 |
| 28 | NETMAT edge ICA 3                              | 28 |
| 29 | NETMAT edge ICA 4                              | 29 |

Figure 1: T1 FAST ROIs R intracalc cortex

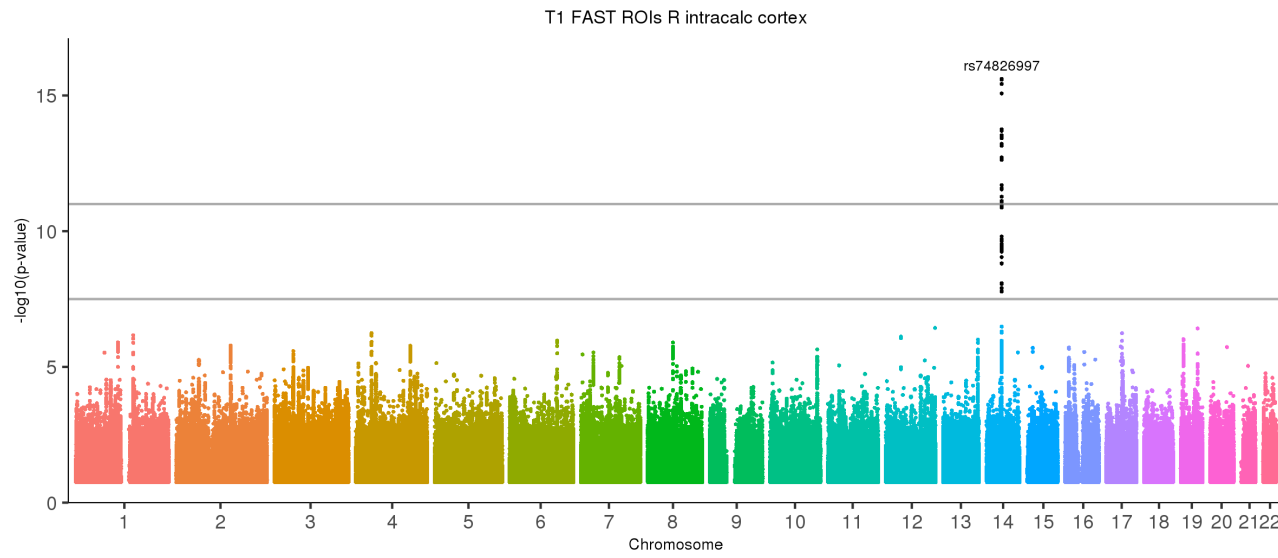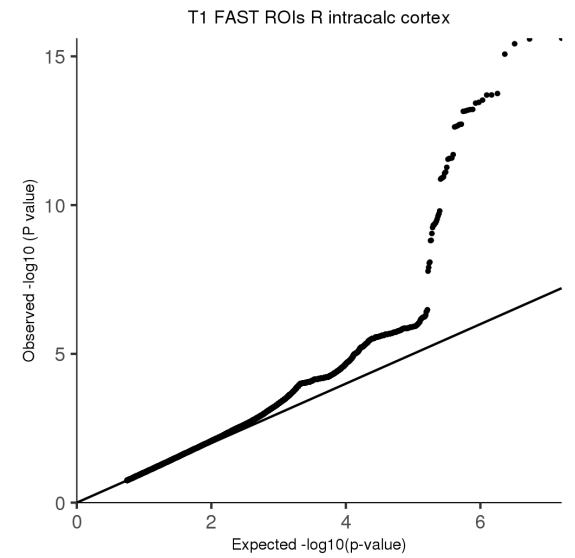

[back to list of plots](#)

Figure 2: T1 FAST ROIs R hippocampus

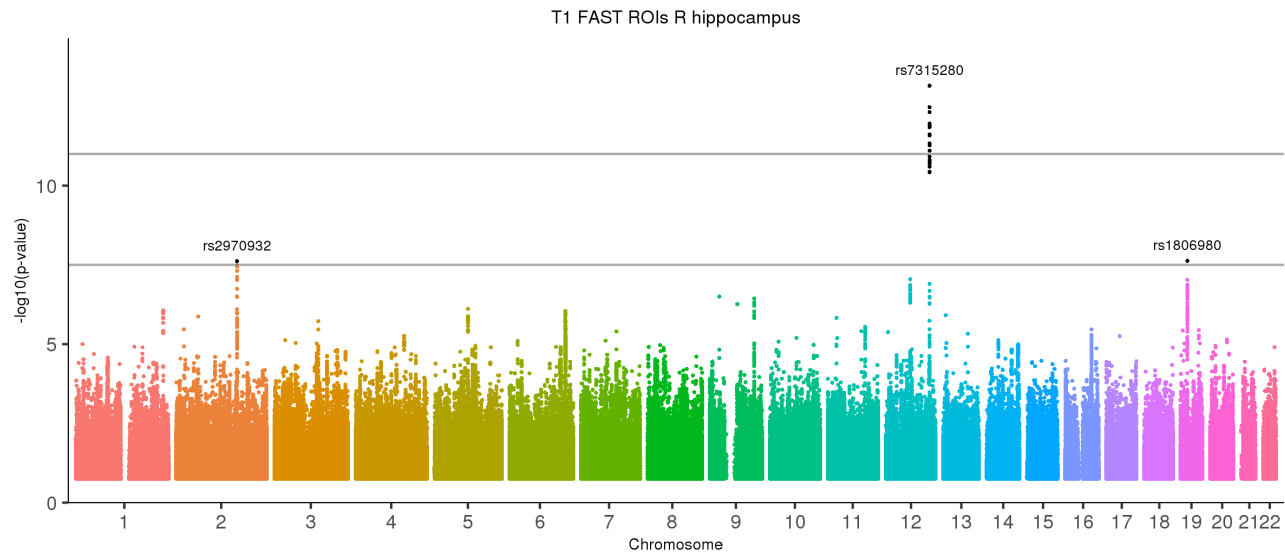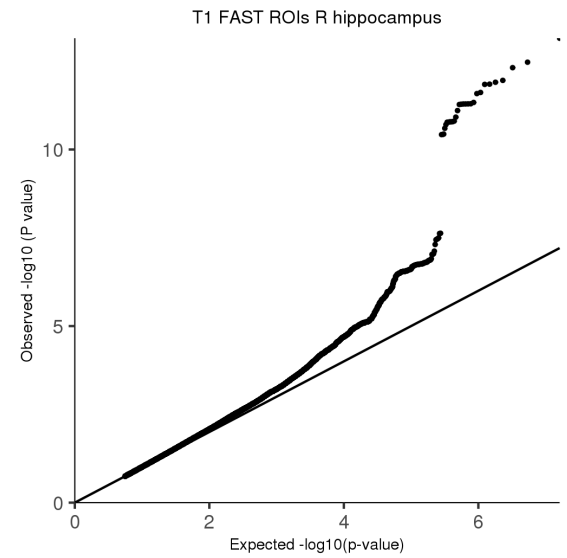

[back to list of plots](#)

Figure 3: T1 FAST ROIs R ventral striatum

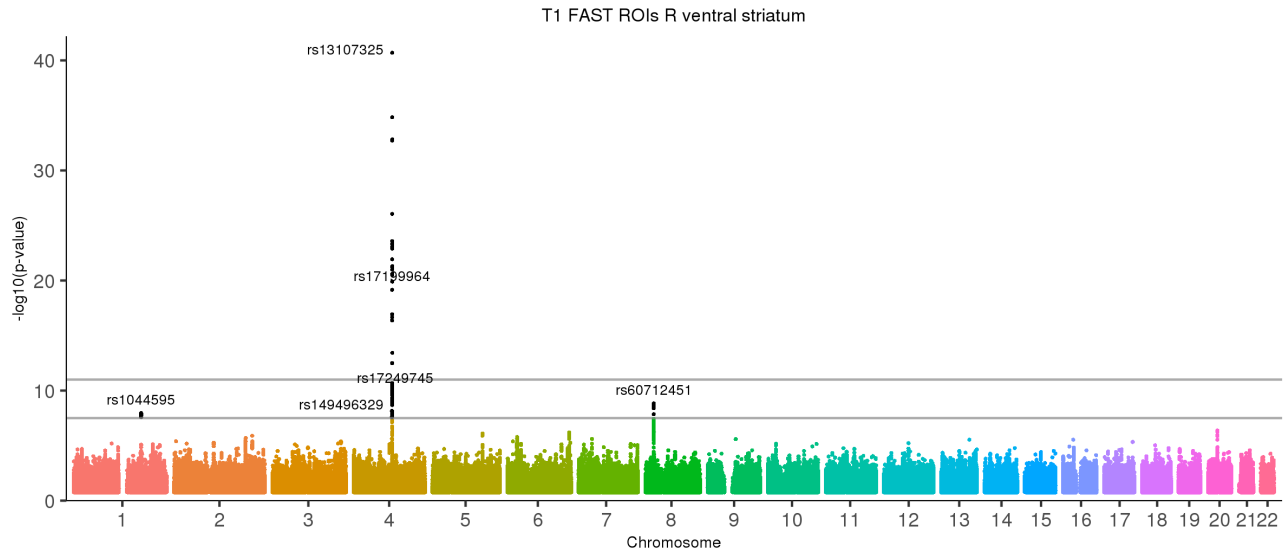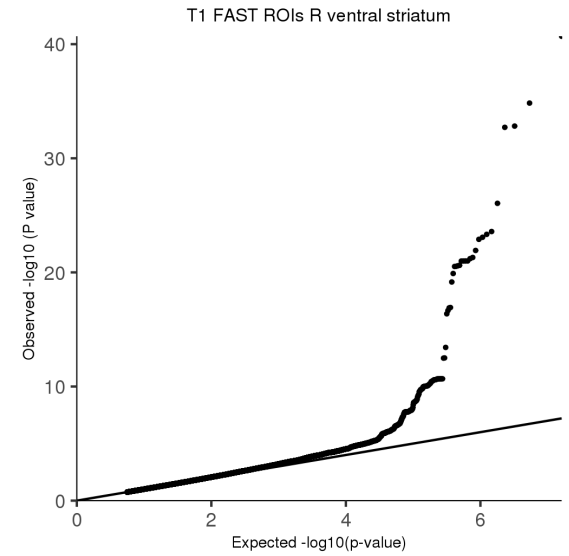

[back to list of plots](#)

Figure 4: T1 FAST ROIs L cerebellum crus I

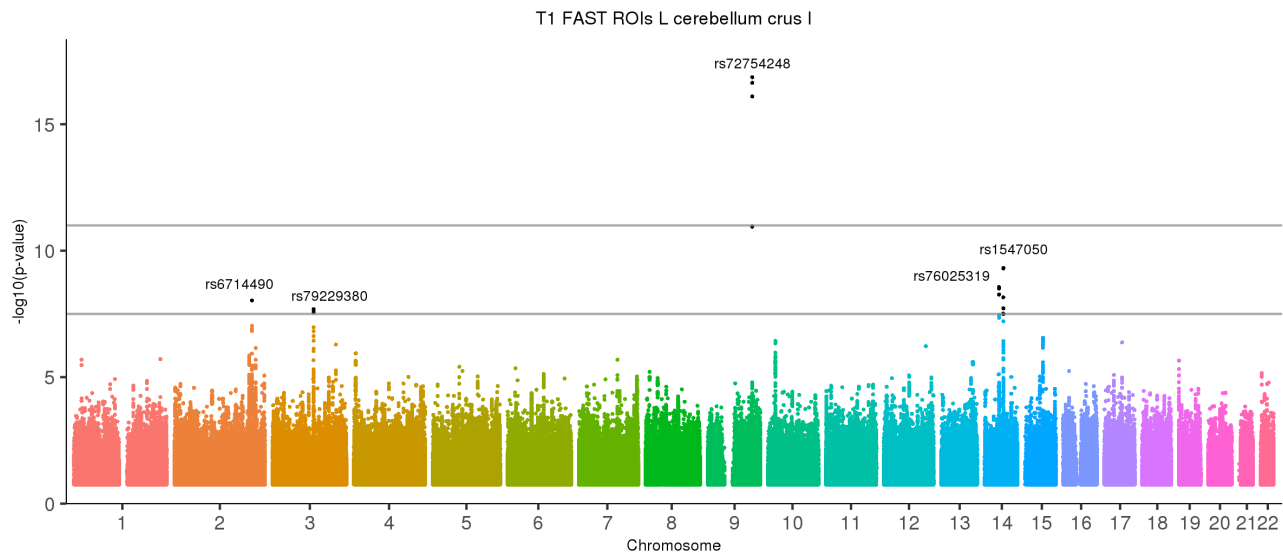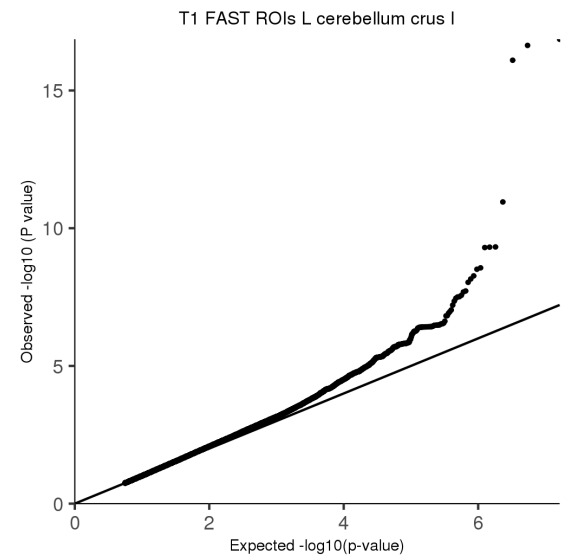

[back to list of plots](#)

Figure 5: T1 FAST ROIs V cerebellum VIIIa

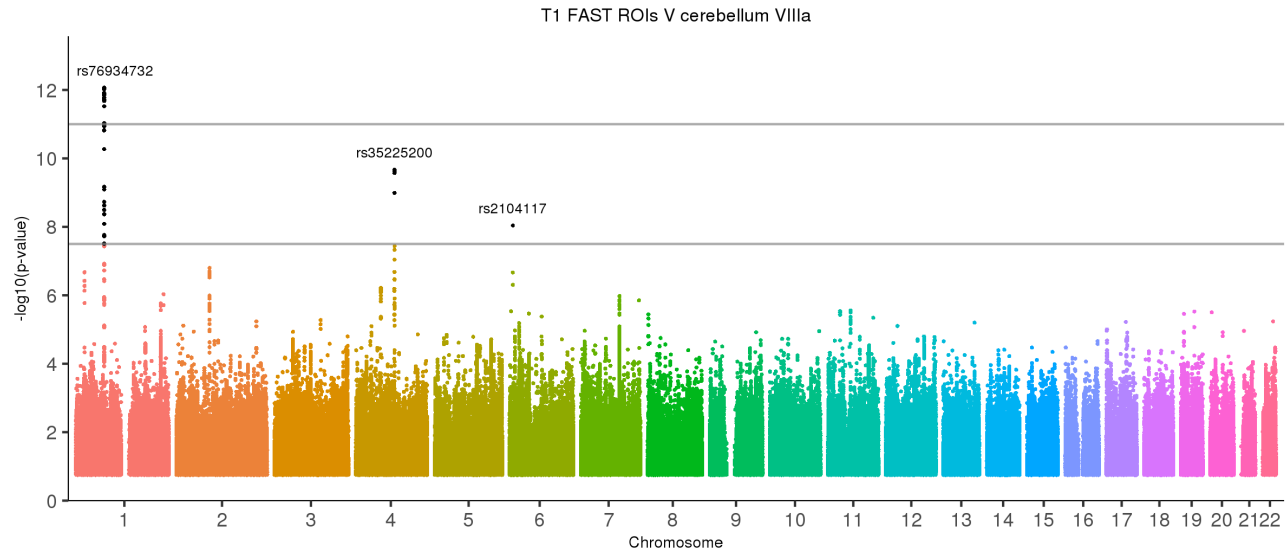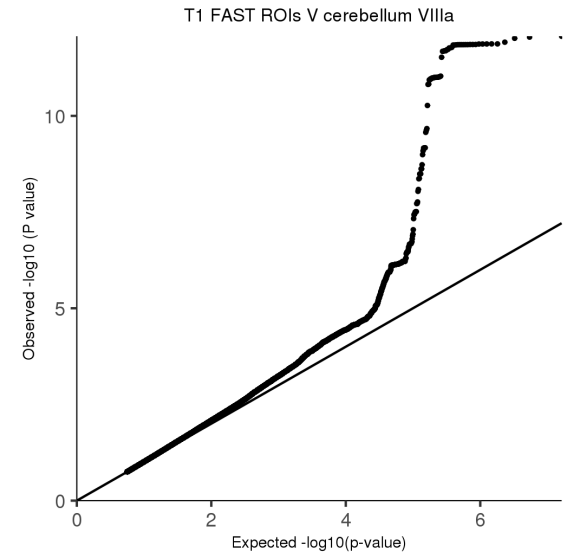

[back to list of plots](#)

Figure 6: T1 FAST ROIs L cerebellum IX

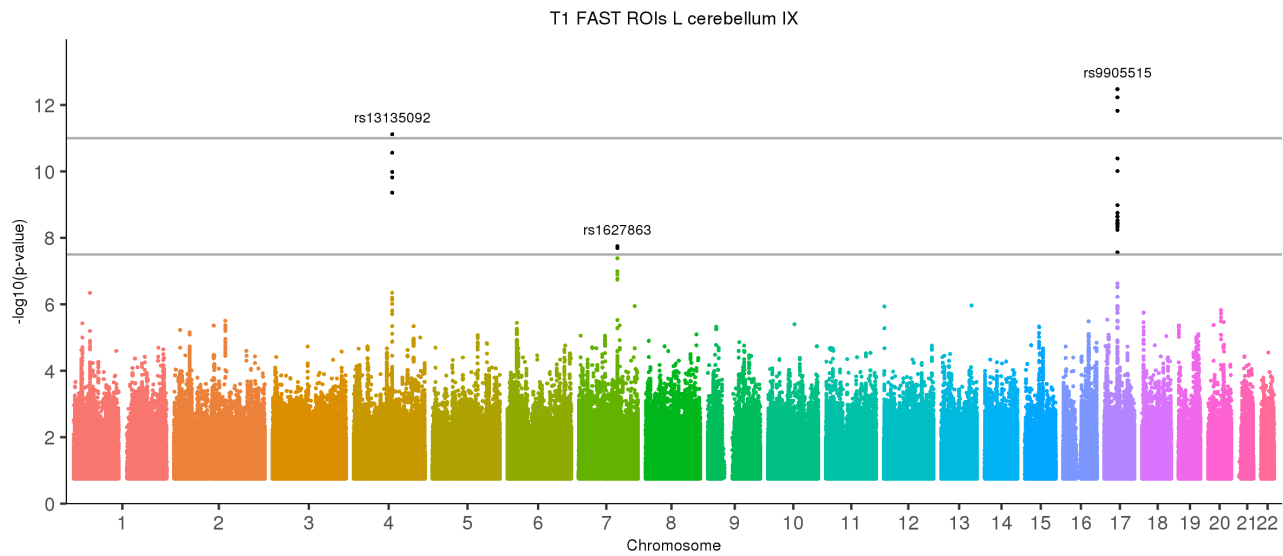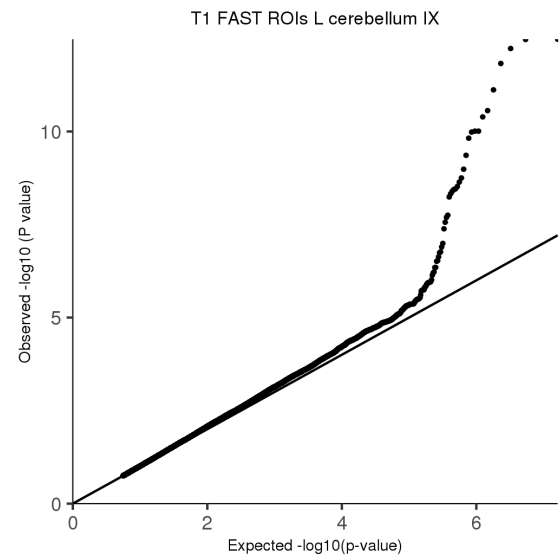

[back to list of plots](#)

Figure 7: T2 FLAIR BIANCA WMH volume

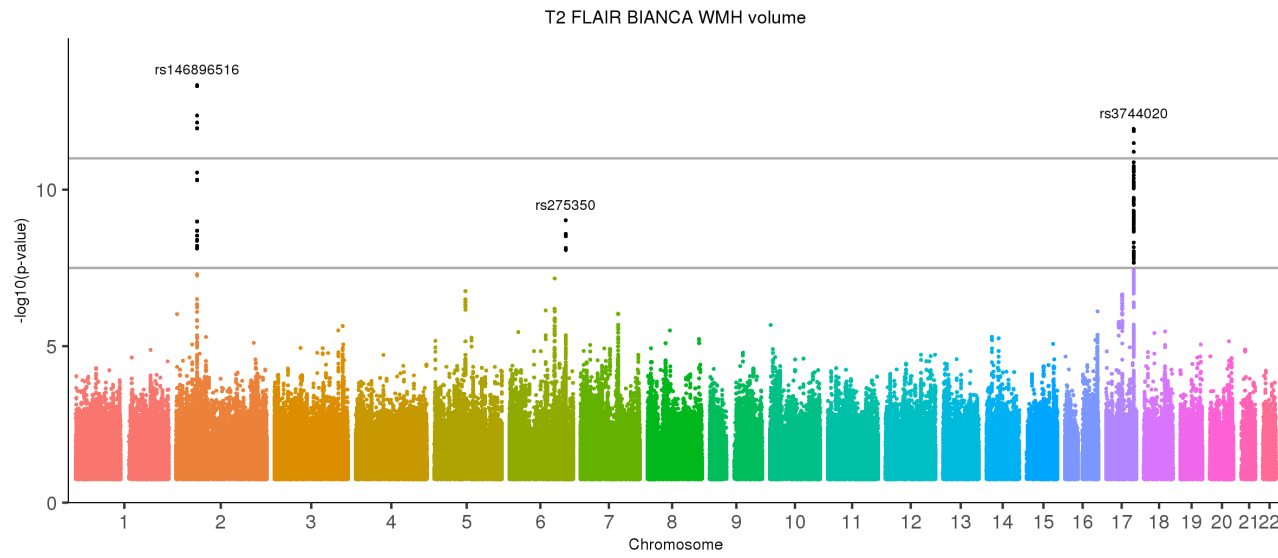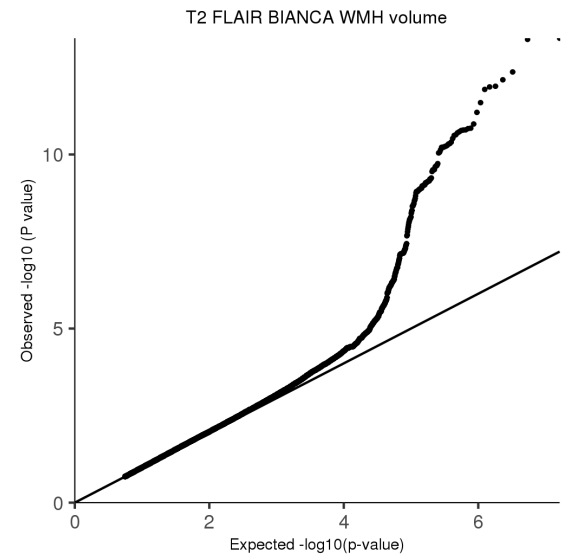

[back to list of plots](#)



Figure 8: dMRI TBSS MO Pontine crossing tract

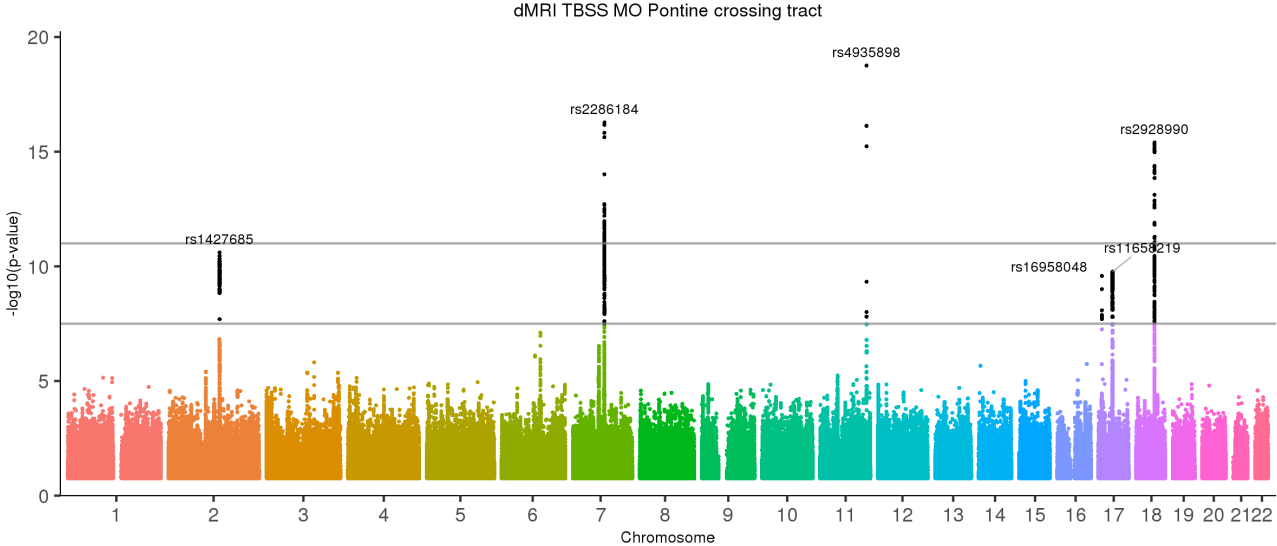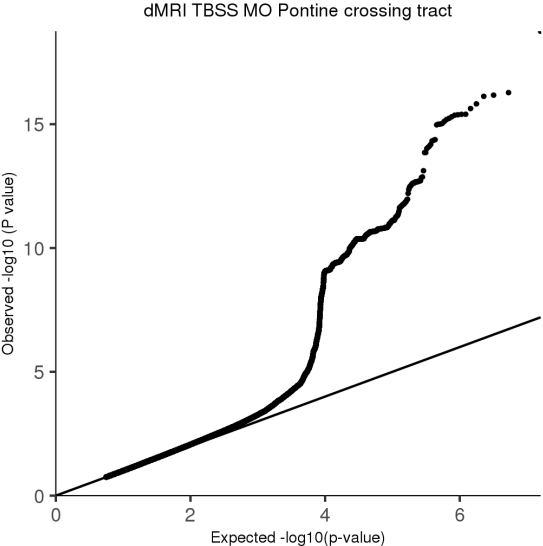

[back to list of plots](#)

Figure 9: dMRI TBSS ICVF Genu of corpus callosum

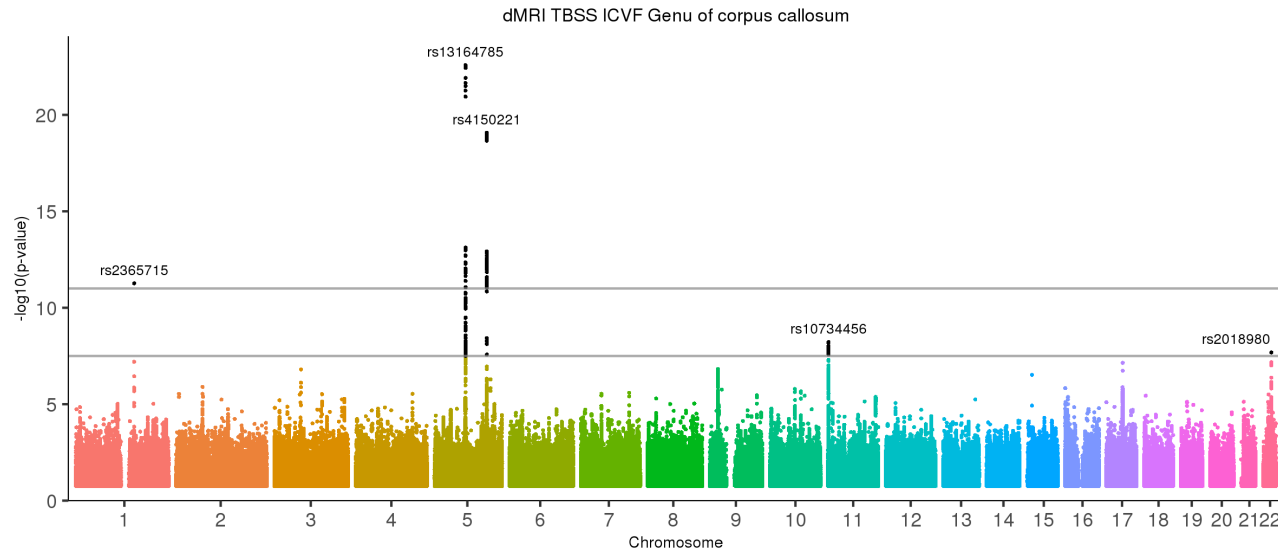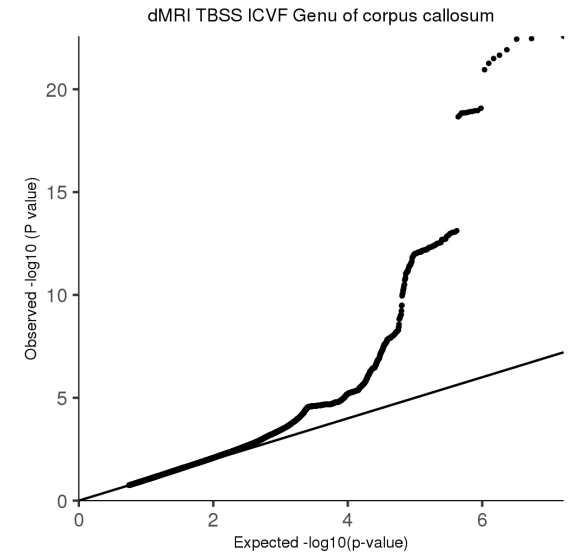

[back to list of plots](#)

Figure 10: dMRI TBSS ICVF Splenium of corpus callosum

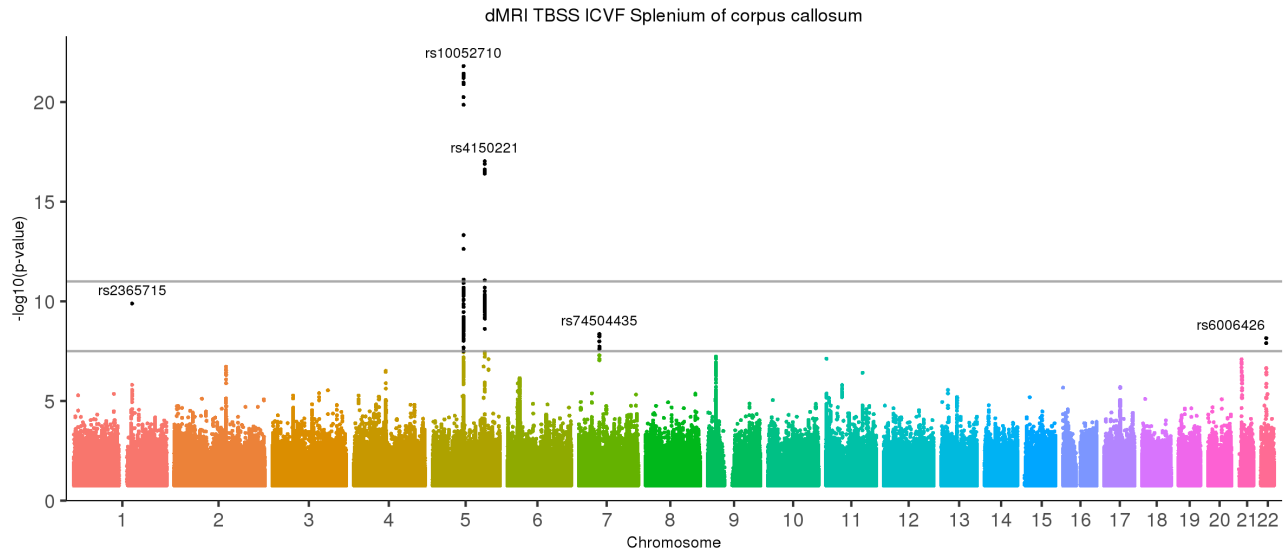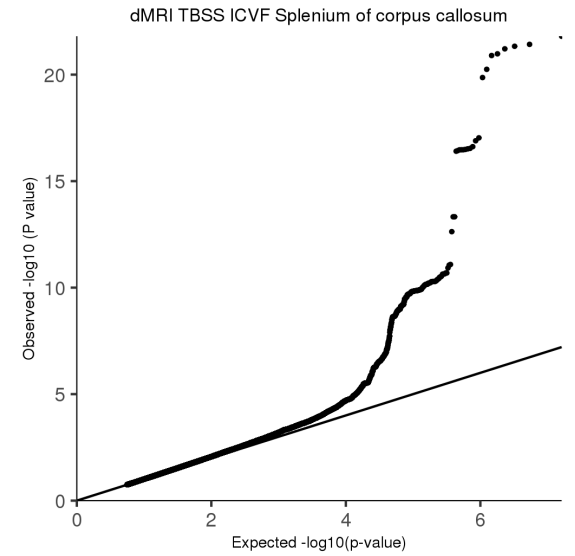

[back to list of plots](#)

Figure 11: dMRI TBSS ICVF Superior cerebellar peduncle L

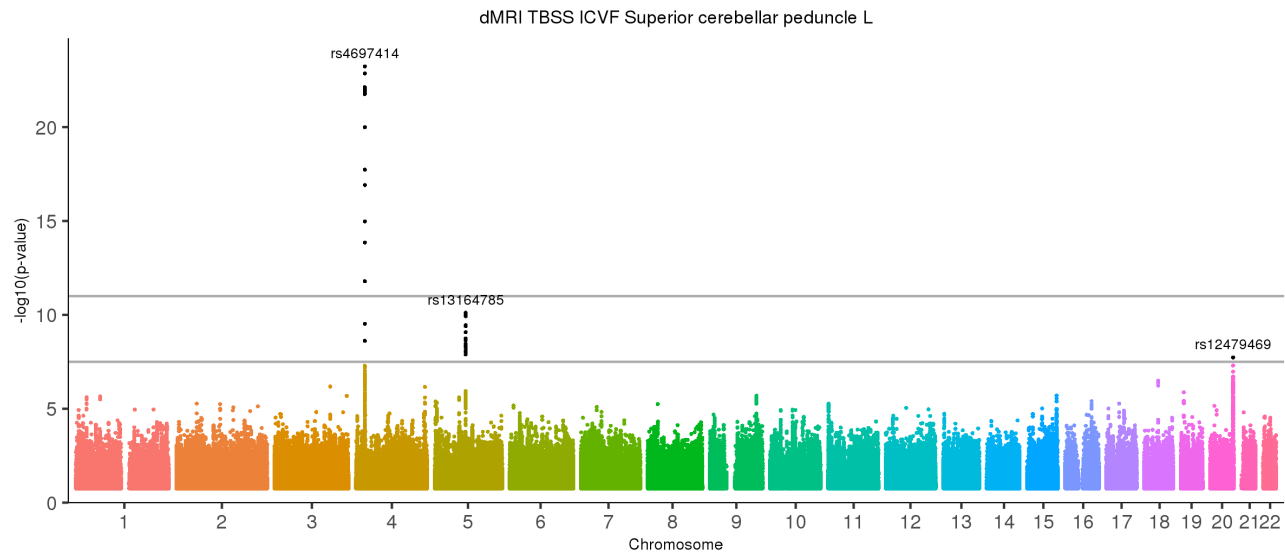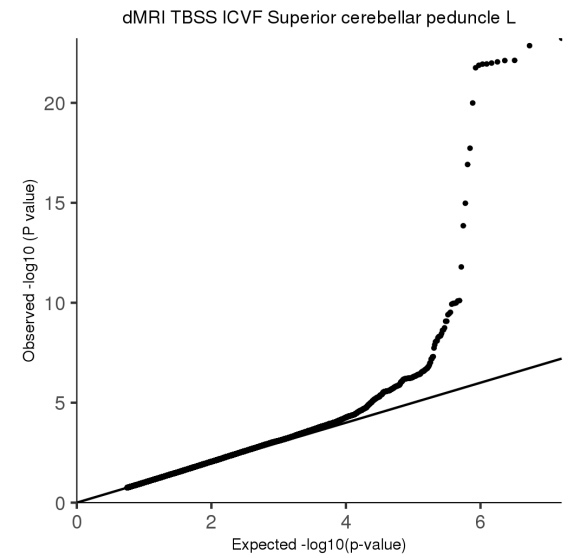

[back to list of plots](#)

Figure 12: dMRI TBSS OD Genu of corpus callosum

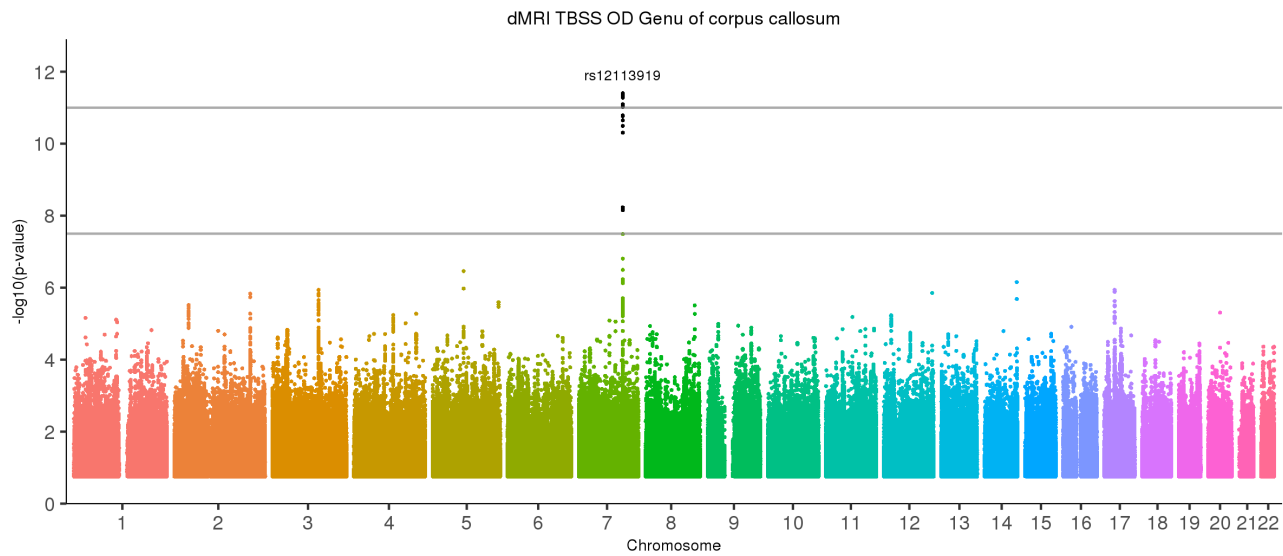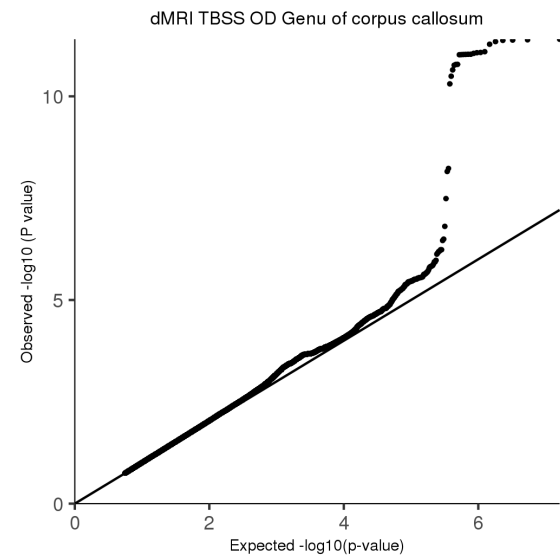

[back to list of plots](#)

Figure 13: dMRI ProbtrackX ICVF ilf r

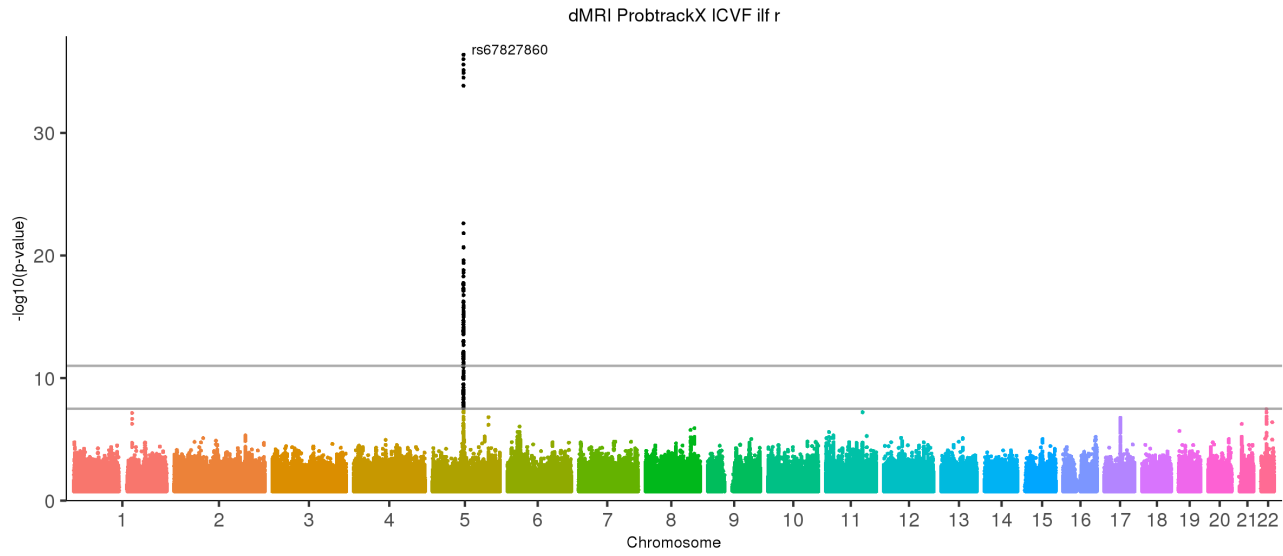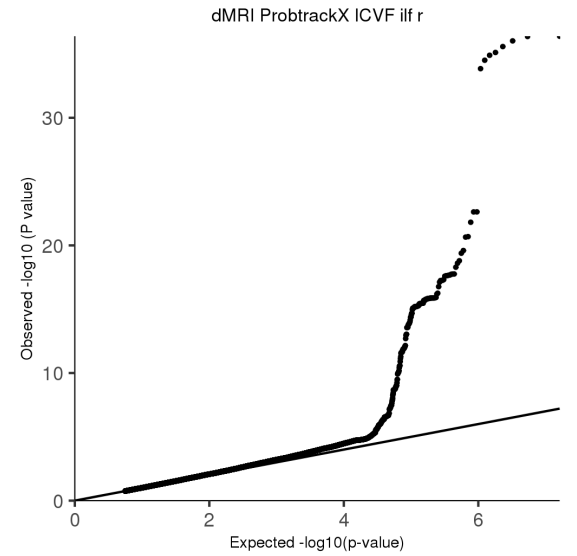

[back to list of plots](#)

Figure 14: dMRI ProbtrackX ISOVF unc r

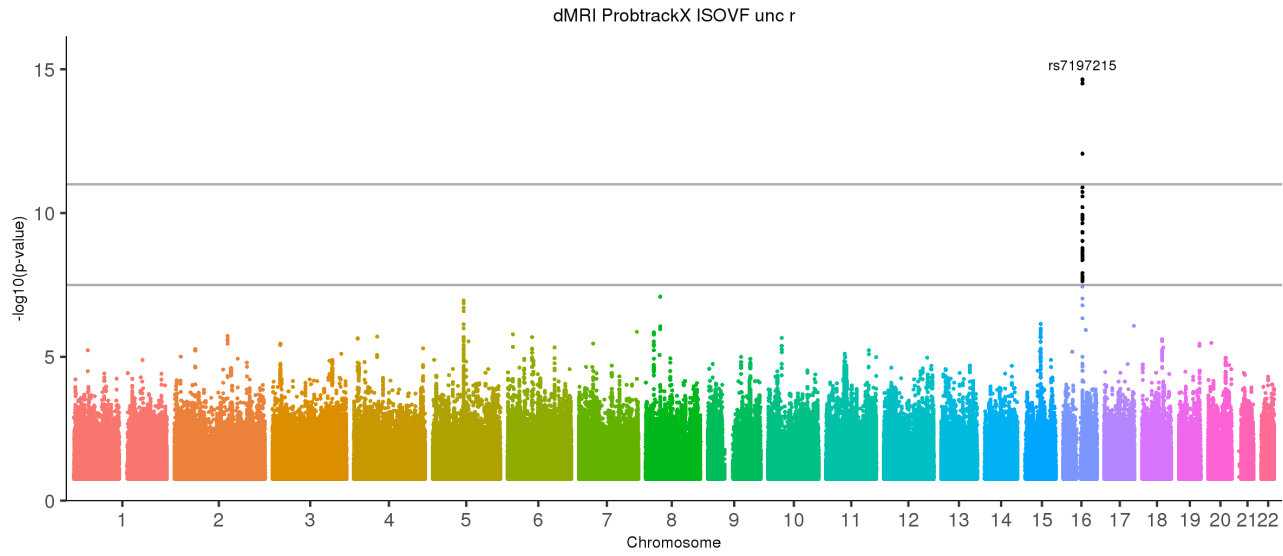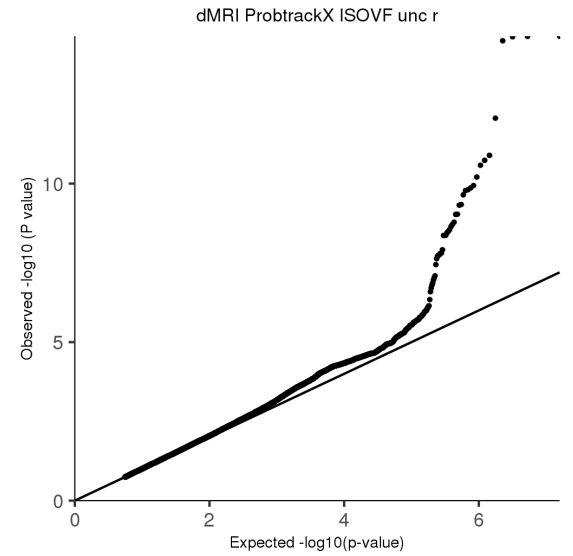

[back to list of plots](#)

Figure 15: NETMAT amplitudes (25) 05

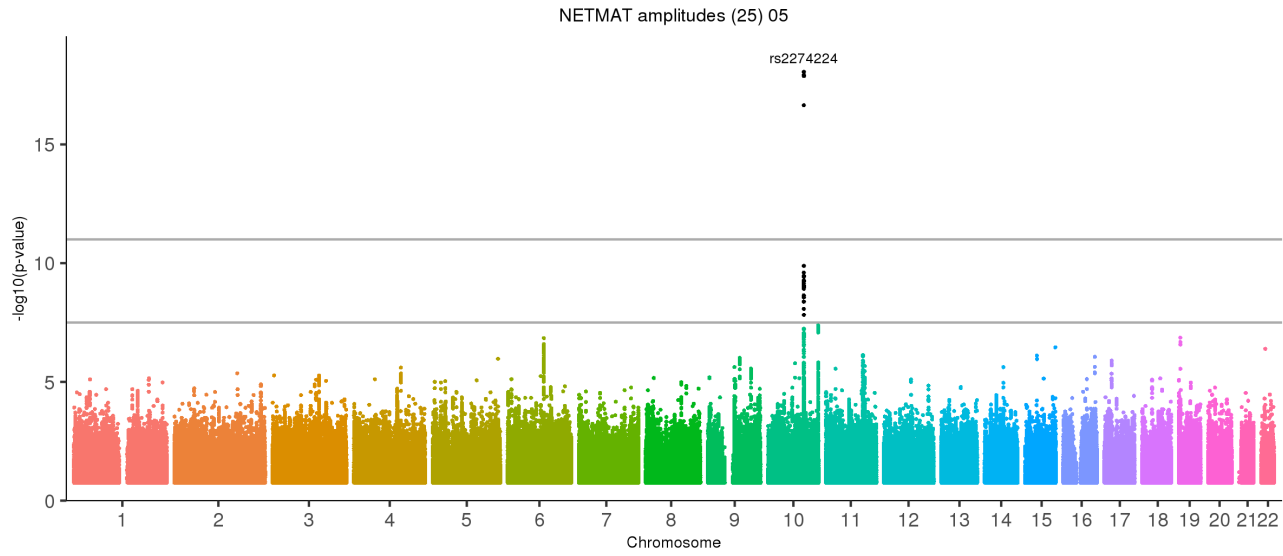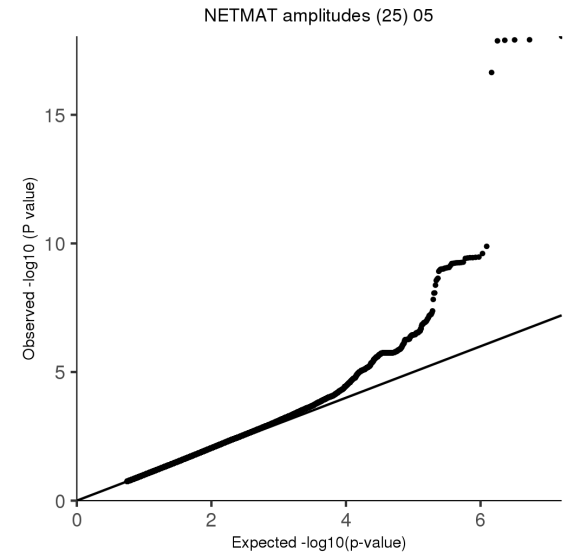

[back to list of plots](#)



Figure 16: NETMAT amplitudes (25) 12

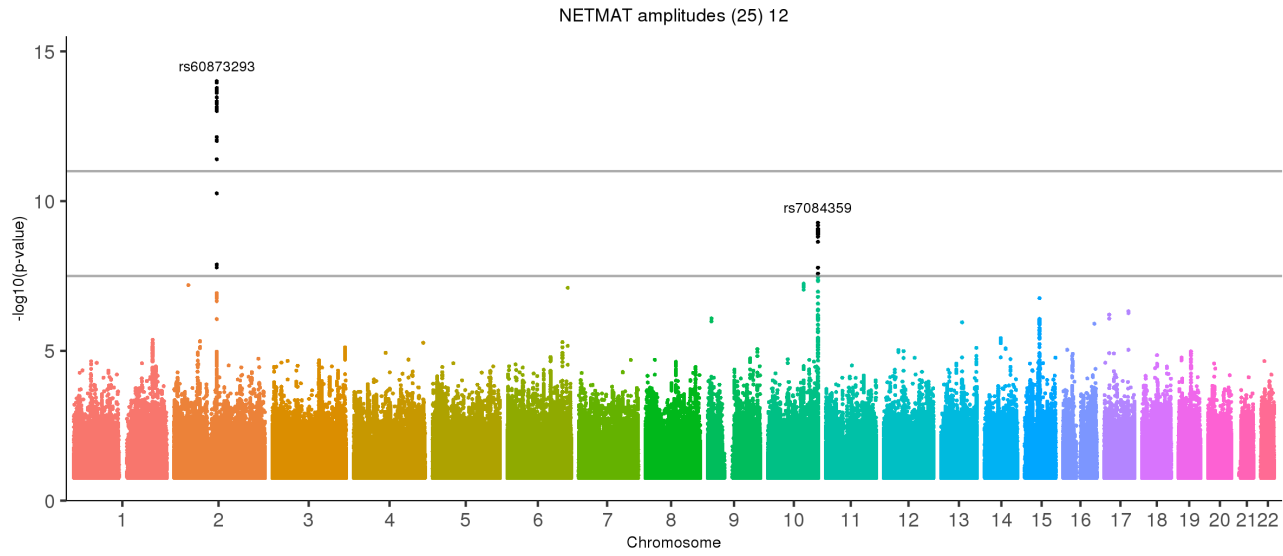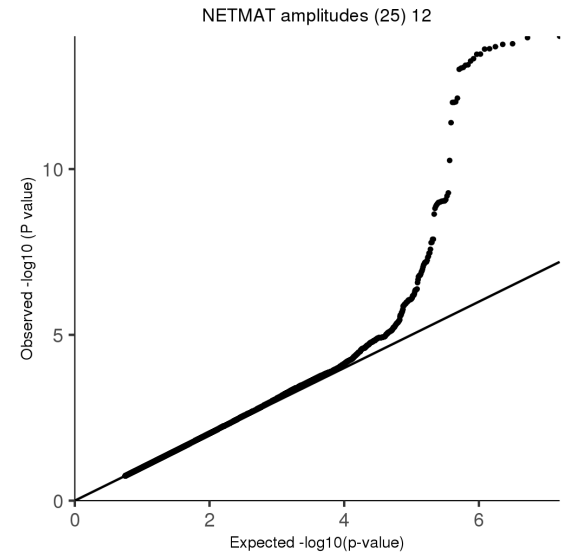

[back to list of plots](#)

Figure 17: NETMAT amplitudes (25) 13

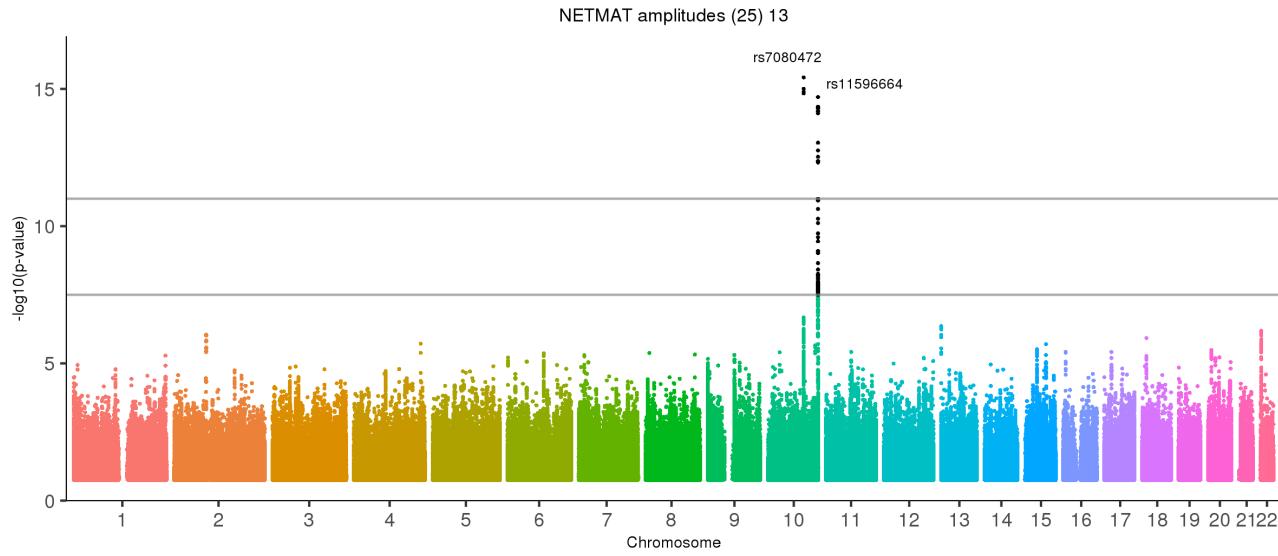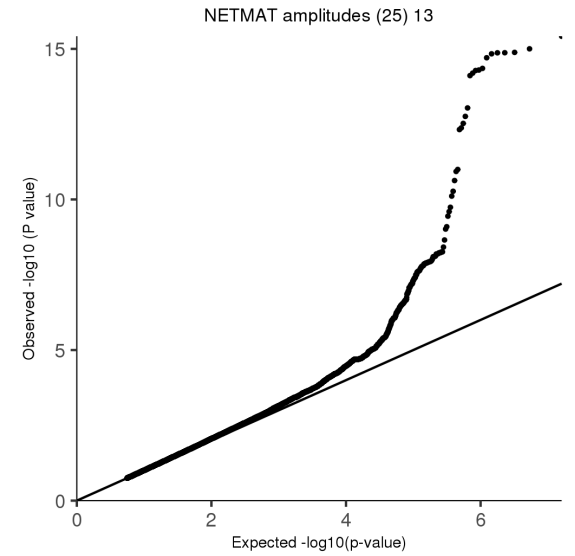

[back to list of plots](#)

Figure 18: T1 FIRST left plus right pallidum volume

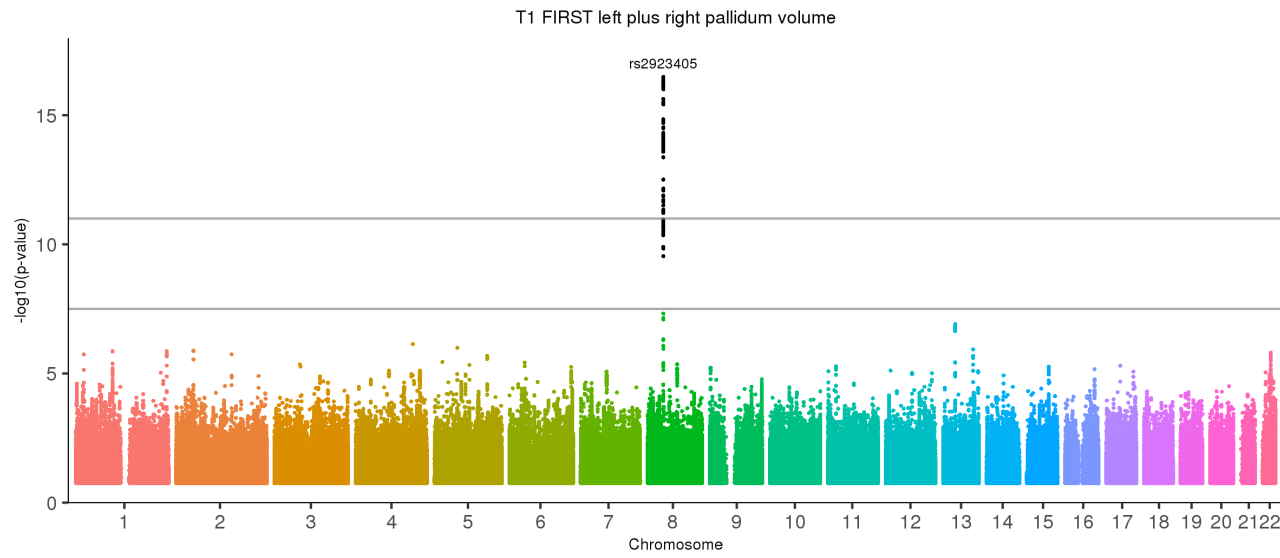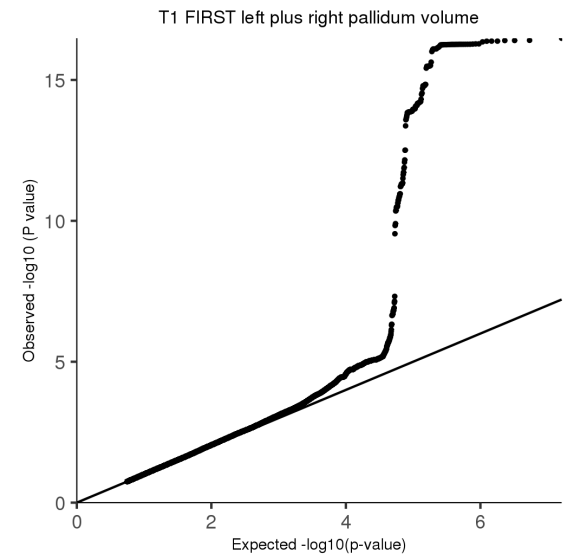

[back to list of plots](#)

Figure 19: SWI T2star left plus right caudate

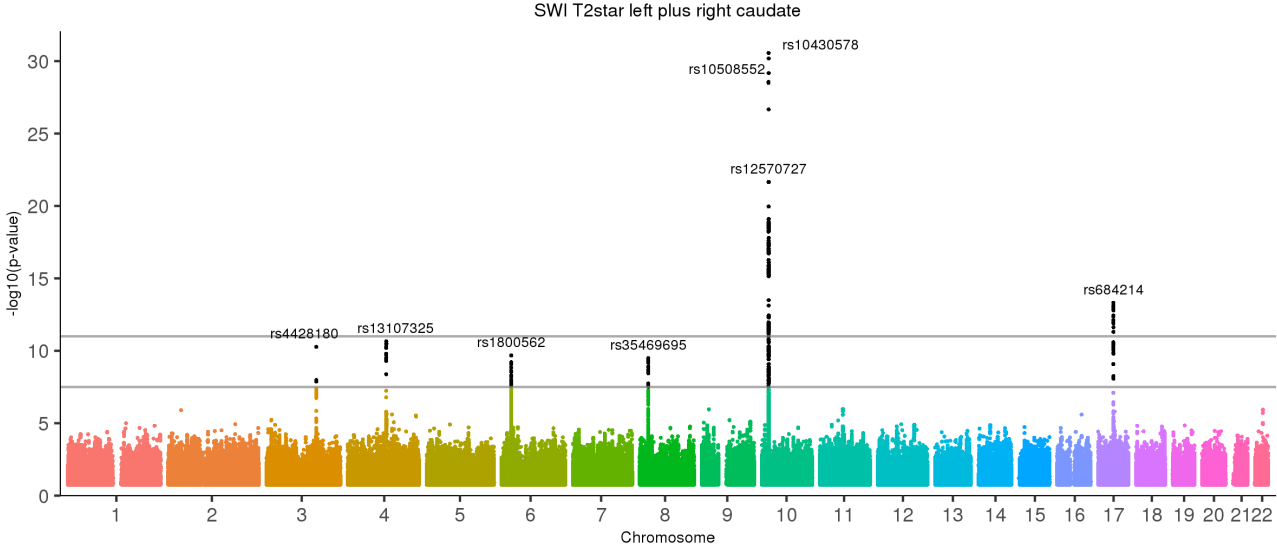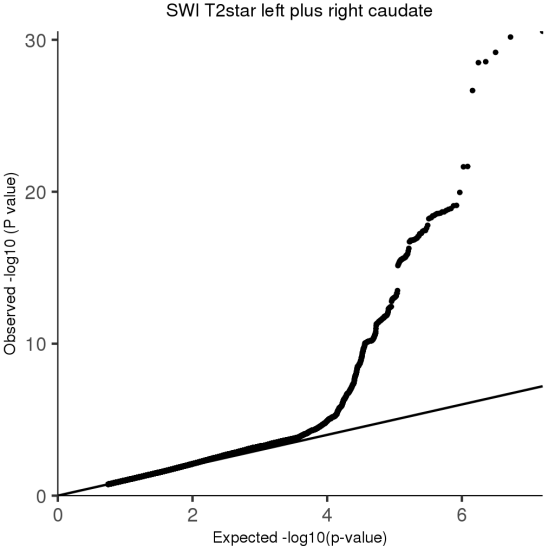

[back to list of plots](#)

Figure 20: SWI T2star left plus right putamen

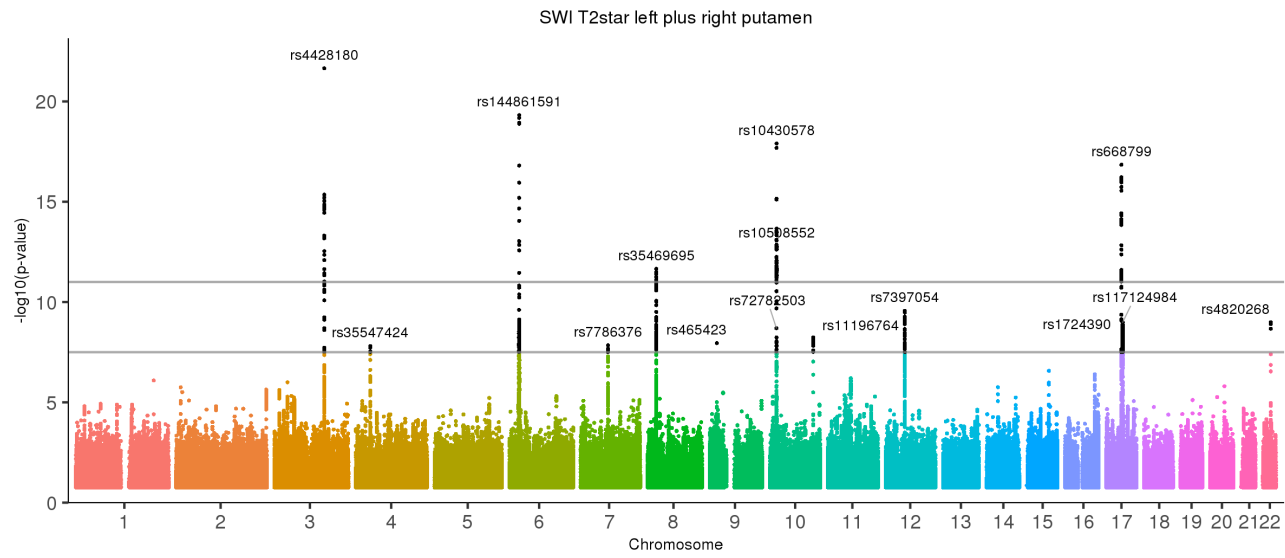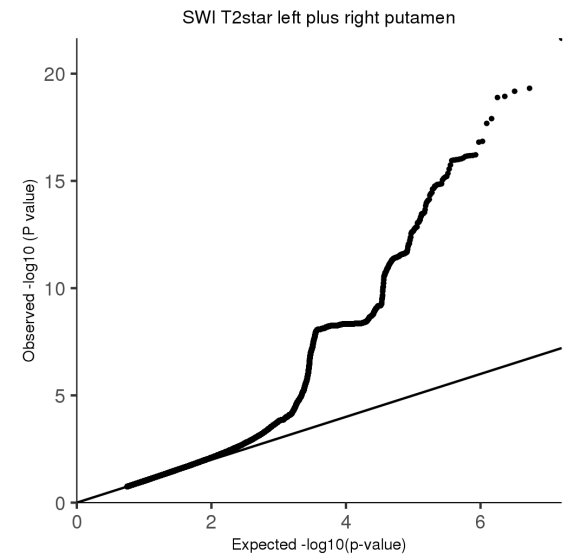

[back to list of plots](#)

Figure 21: SWI T2star left plus right pallidum

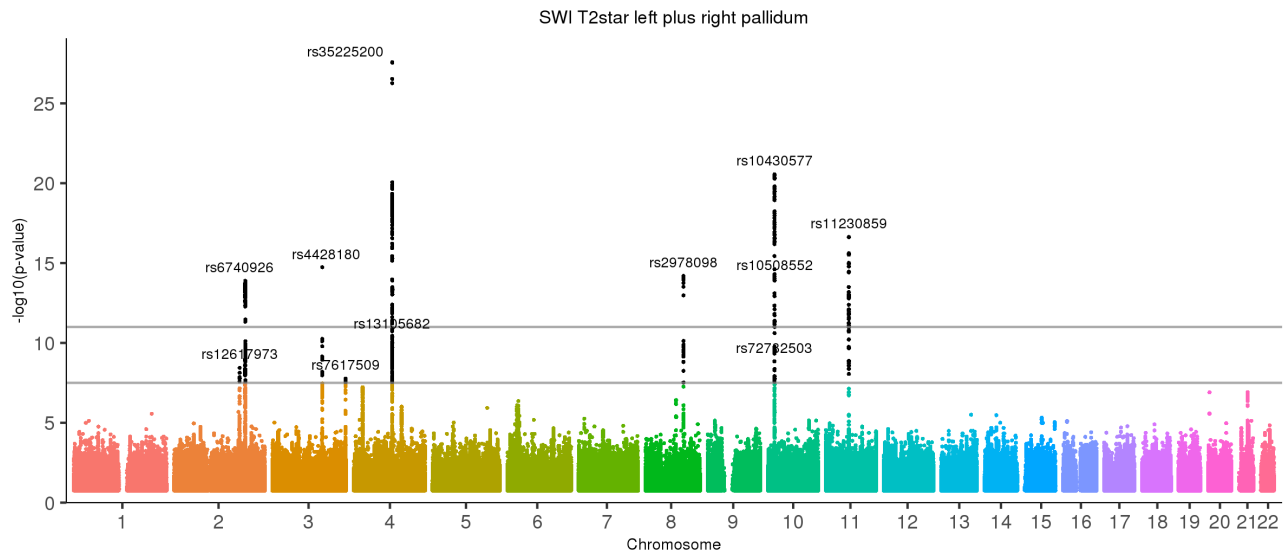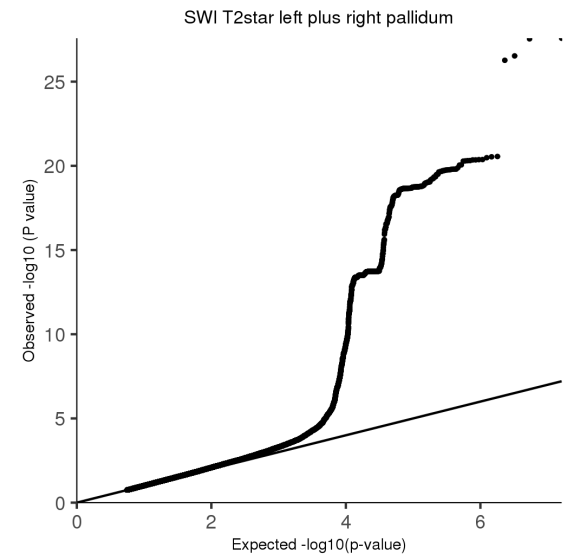

[back to list of plots](#)

Figure 22: FreeSurfer volume Left-Cerebellum-White-Matter

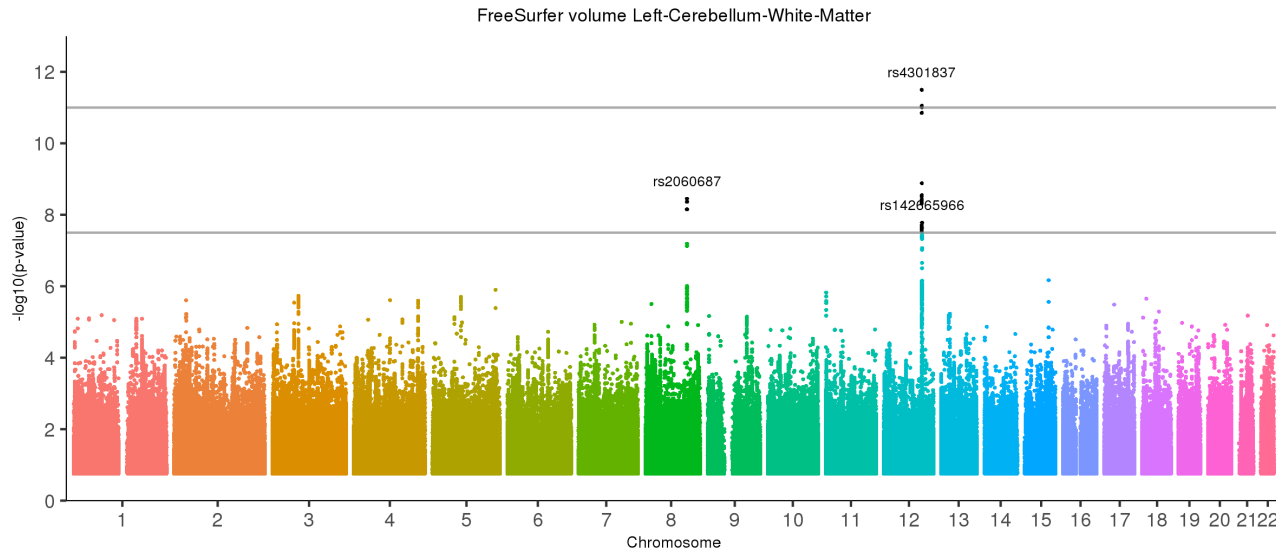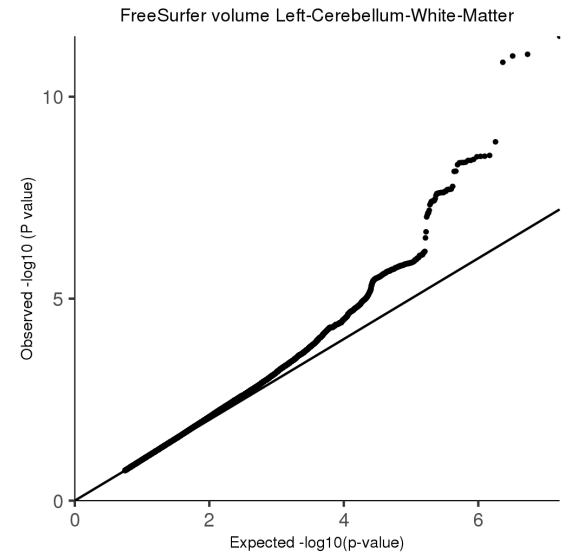

[back to list of plots](#)

Figure 23: FreeSurfer volume 4th-Ventricle

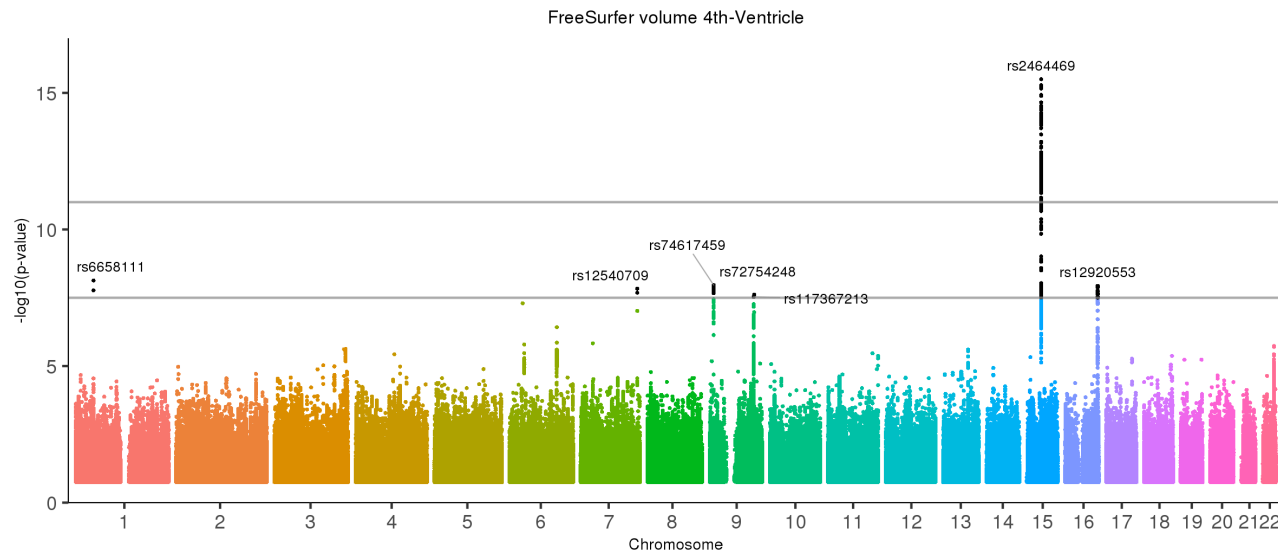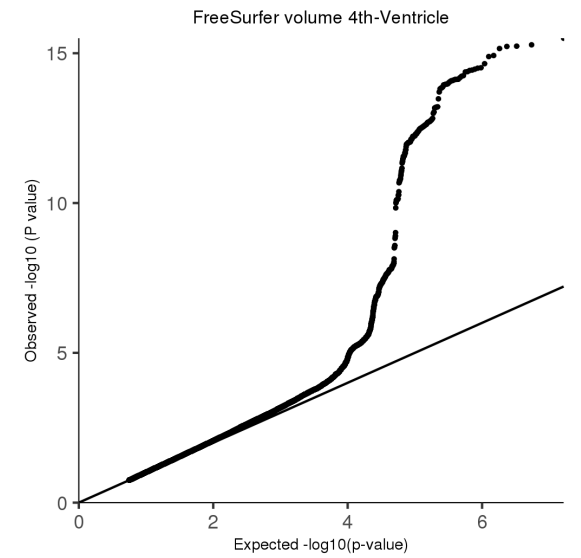

[back to list of plots](#)



Figure 24: FreeSurfer volume Right-Putamen

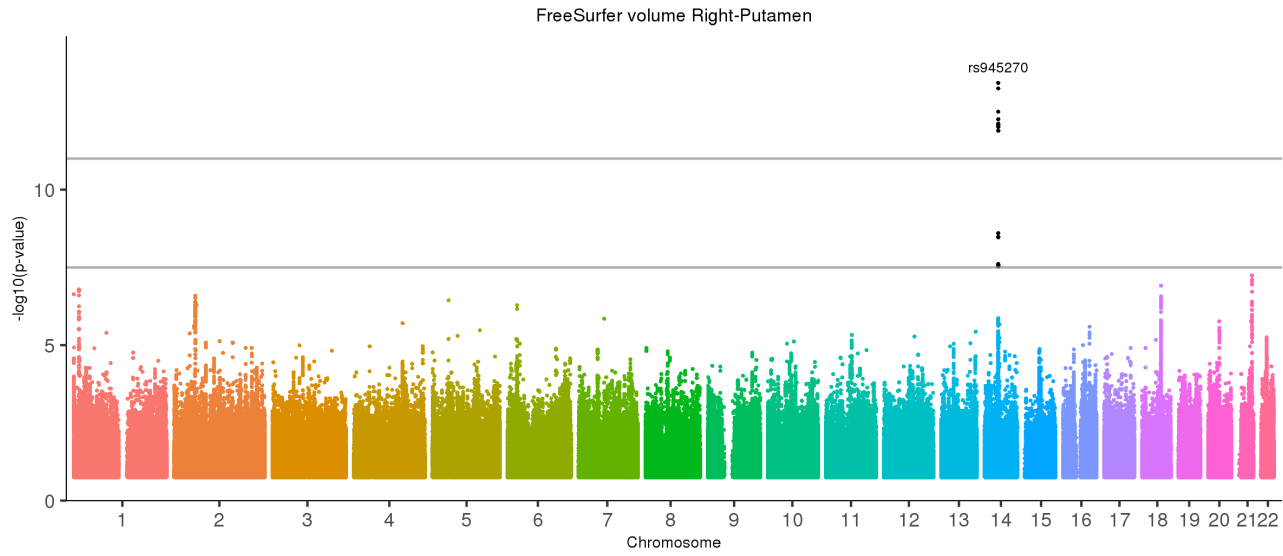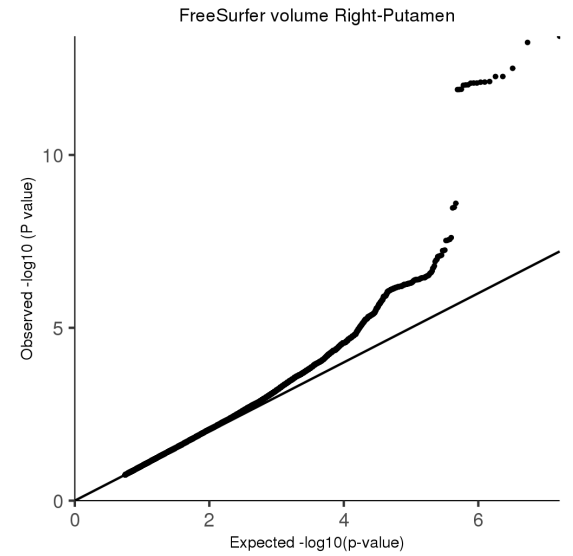

[back to list of plots](#)

Figure 25: FreeSurfer volume MaskVol

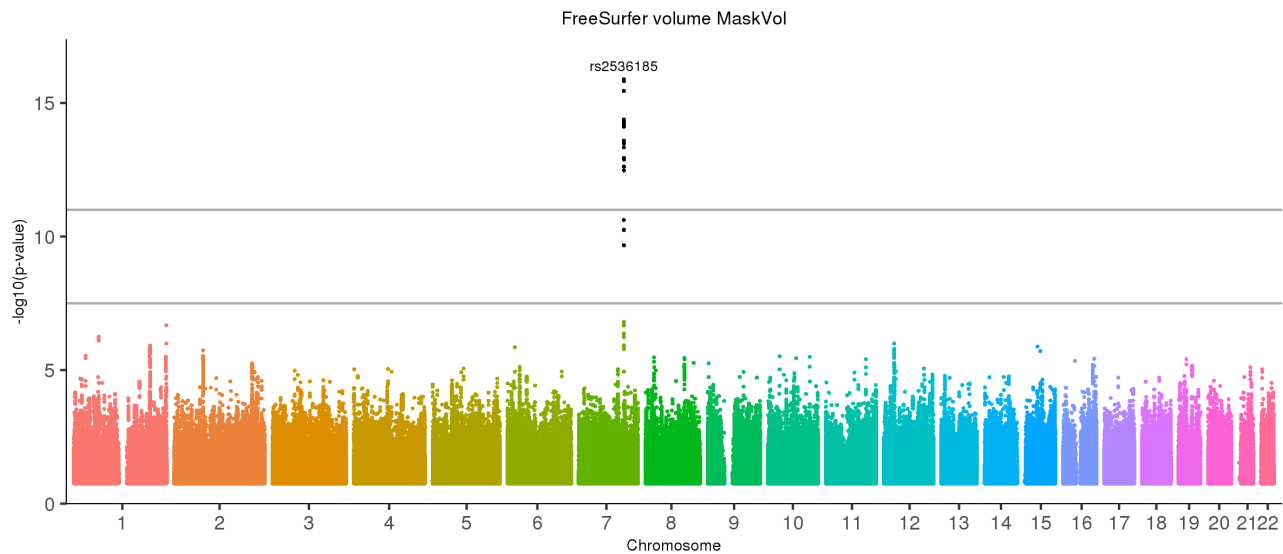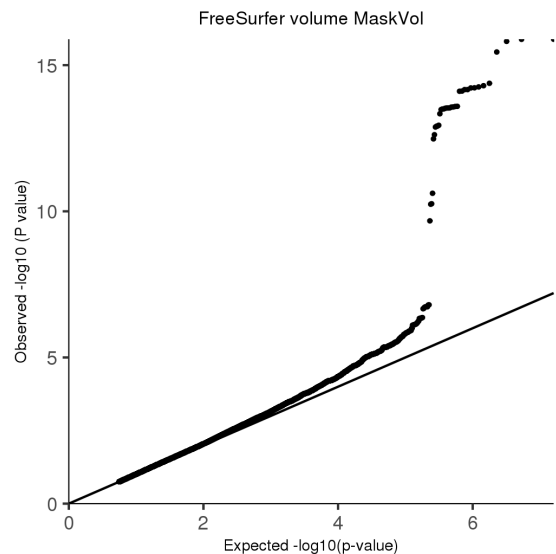

[back to list of plots](#)

Figure 26: FreeSurfer a2009s rh S central area

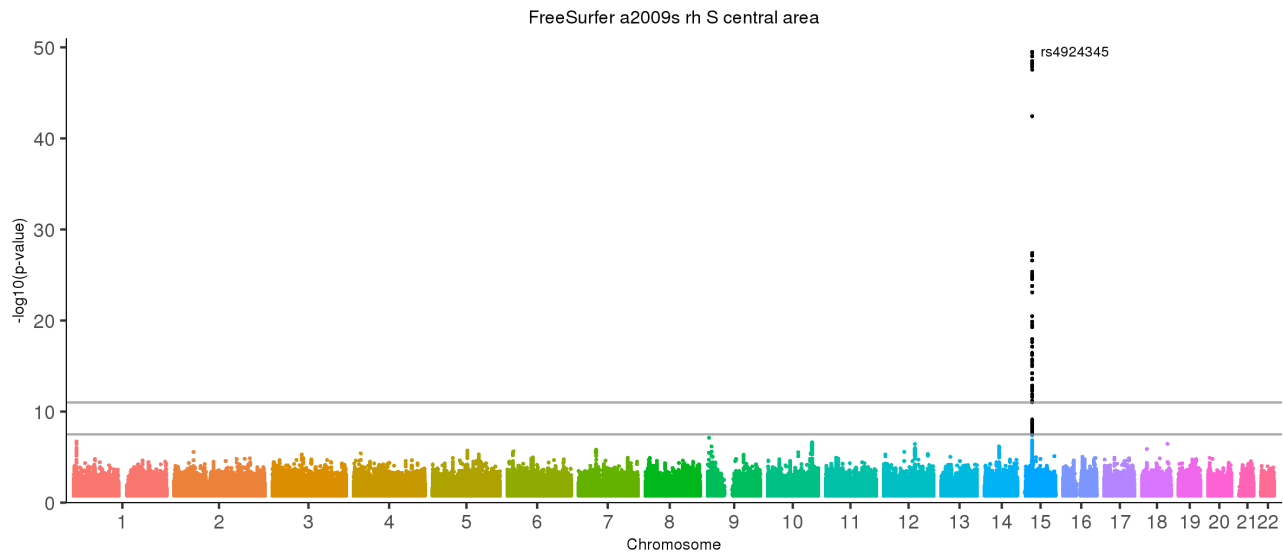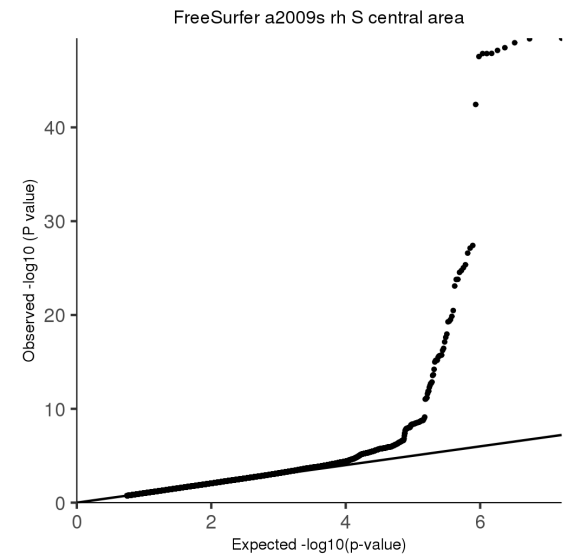

[back to list of plots](#)

Figure 27: NETMAT edge ICA 2

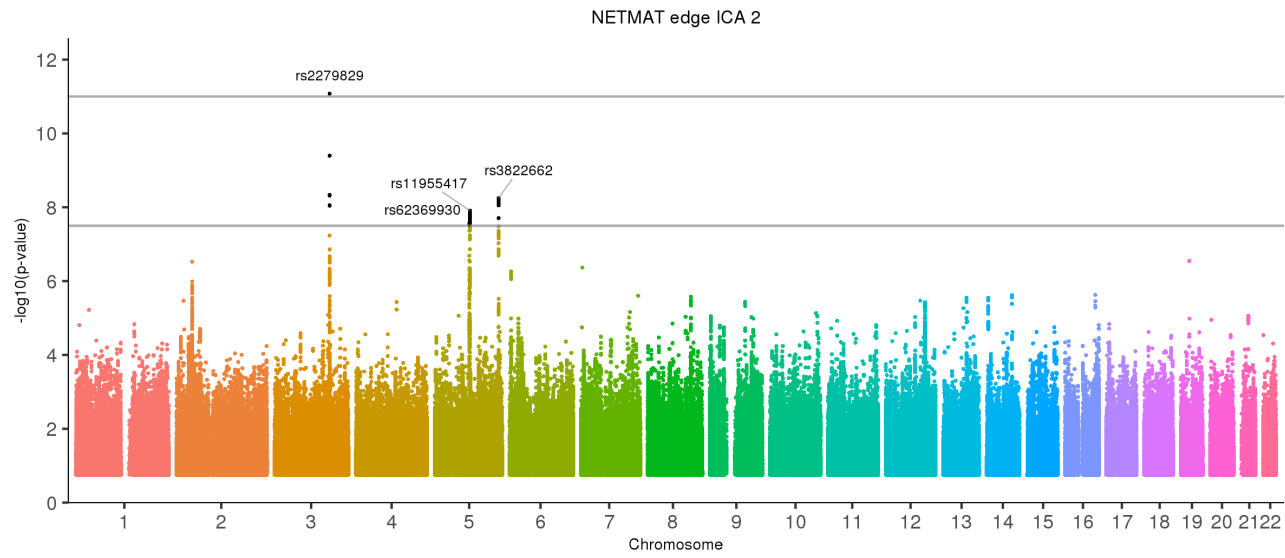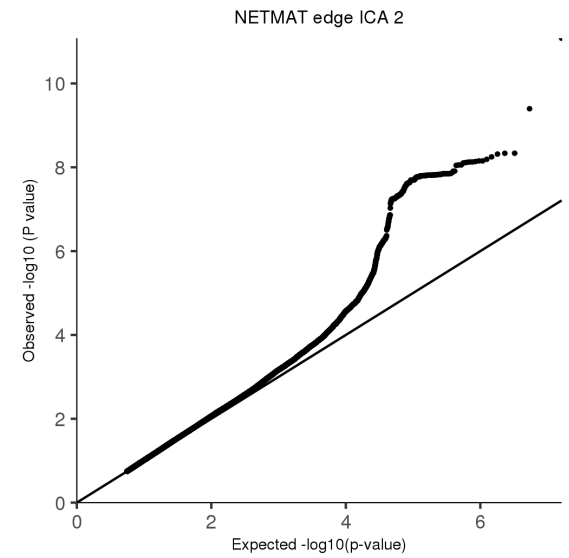

[back to list of plots](#)

Figure 28: NETMAT edge ICA 3

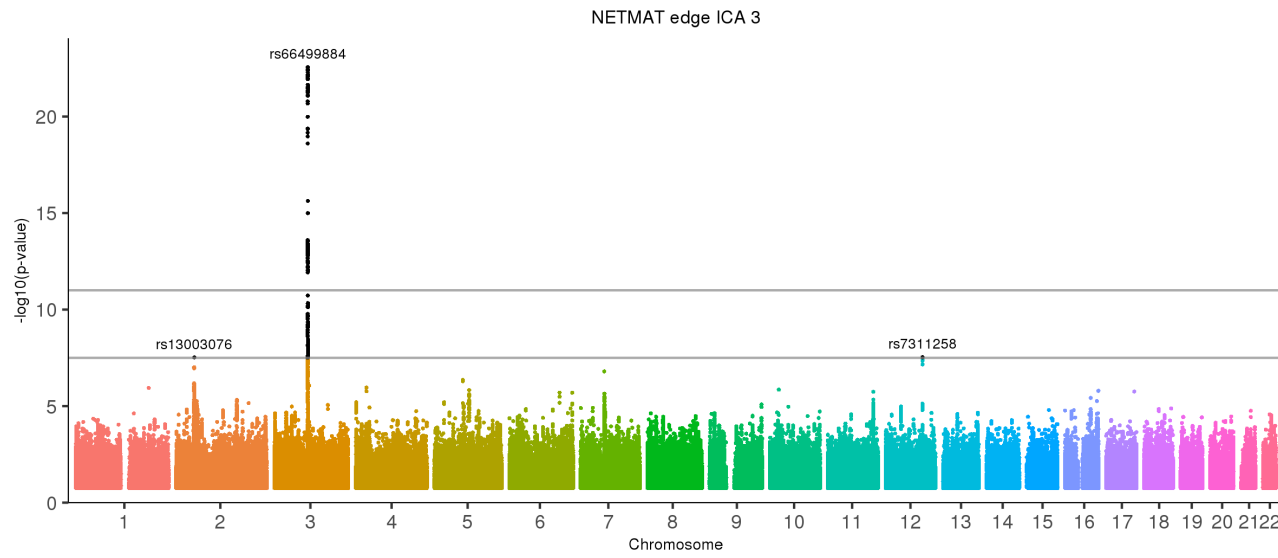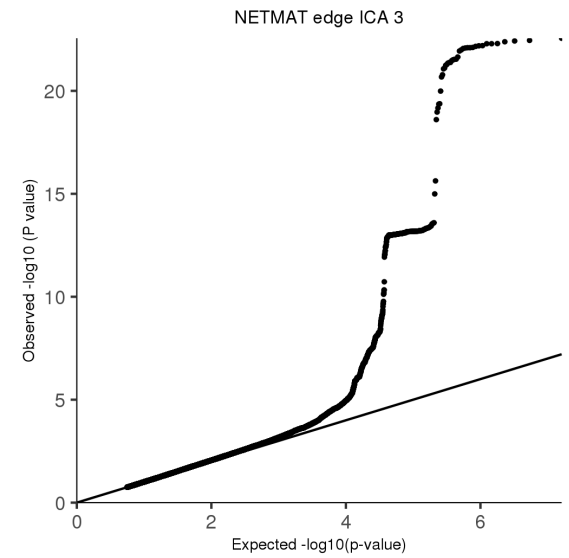

[back to list of plots](#)

Figure 29: NETMAT edge ICA 4

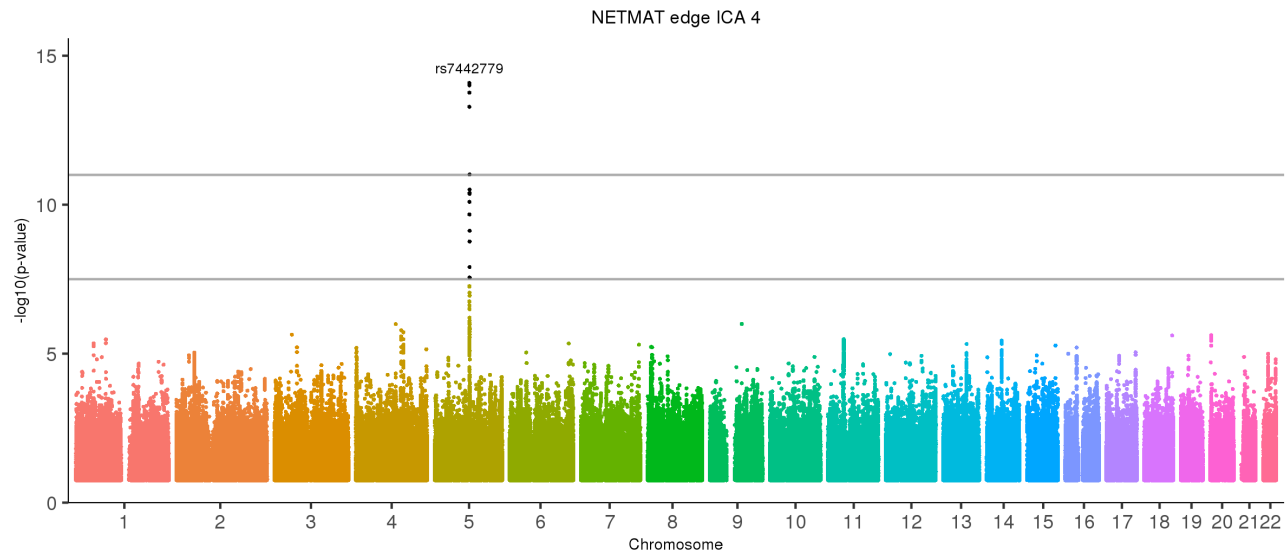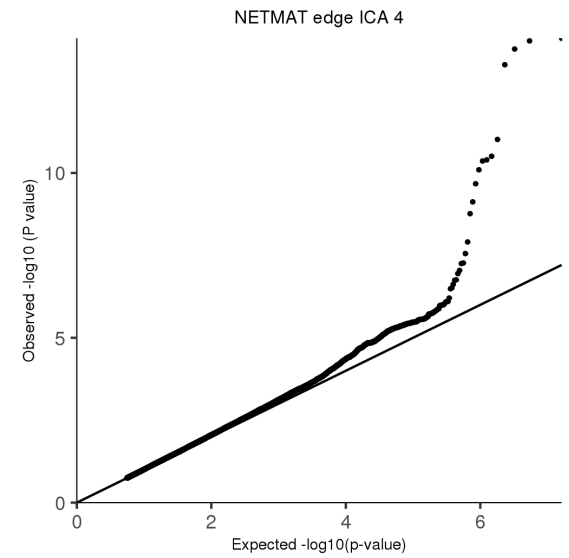

[back to list of plots](#)
